# Supplementary material
Source: MDPI journal article supplement (https://www.mdpi.com/2073-4441/10/12/1848)
Supplement: s1 [file s1]

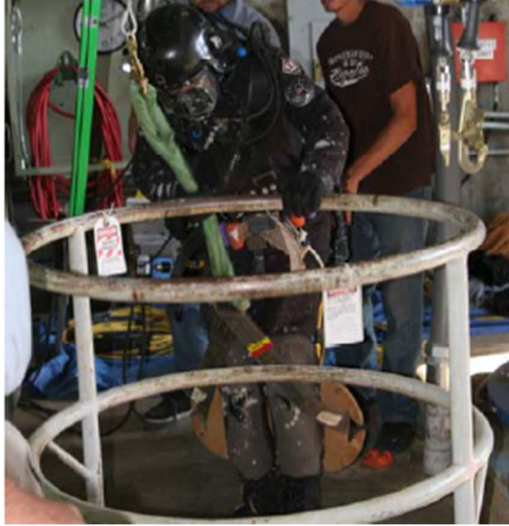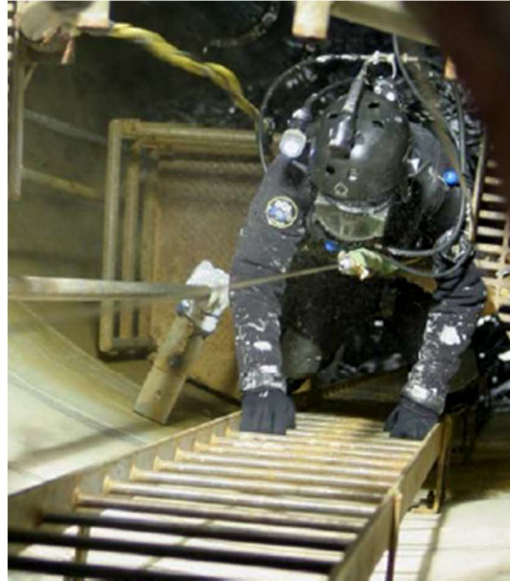

**Figure S1.** Diver preparing to enter one of the collector caisson (left) and diver climbing down one of the collector caisson ladder (right) [Source: 3].

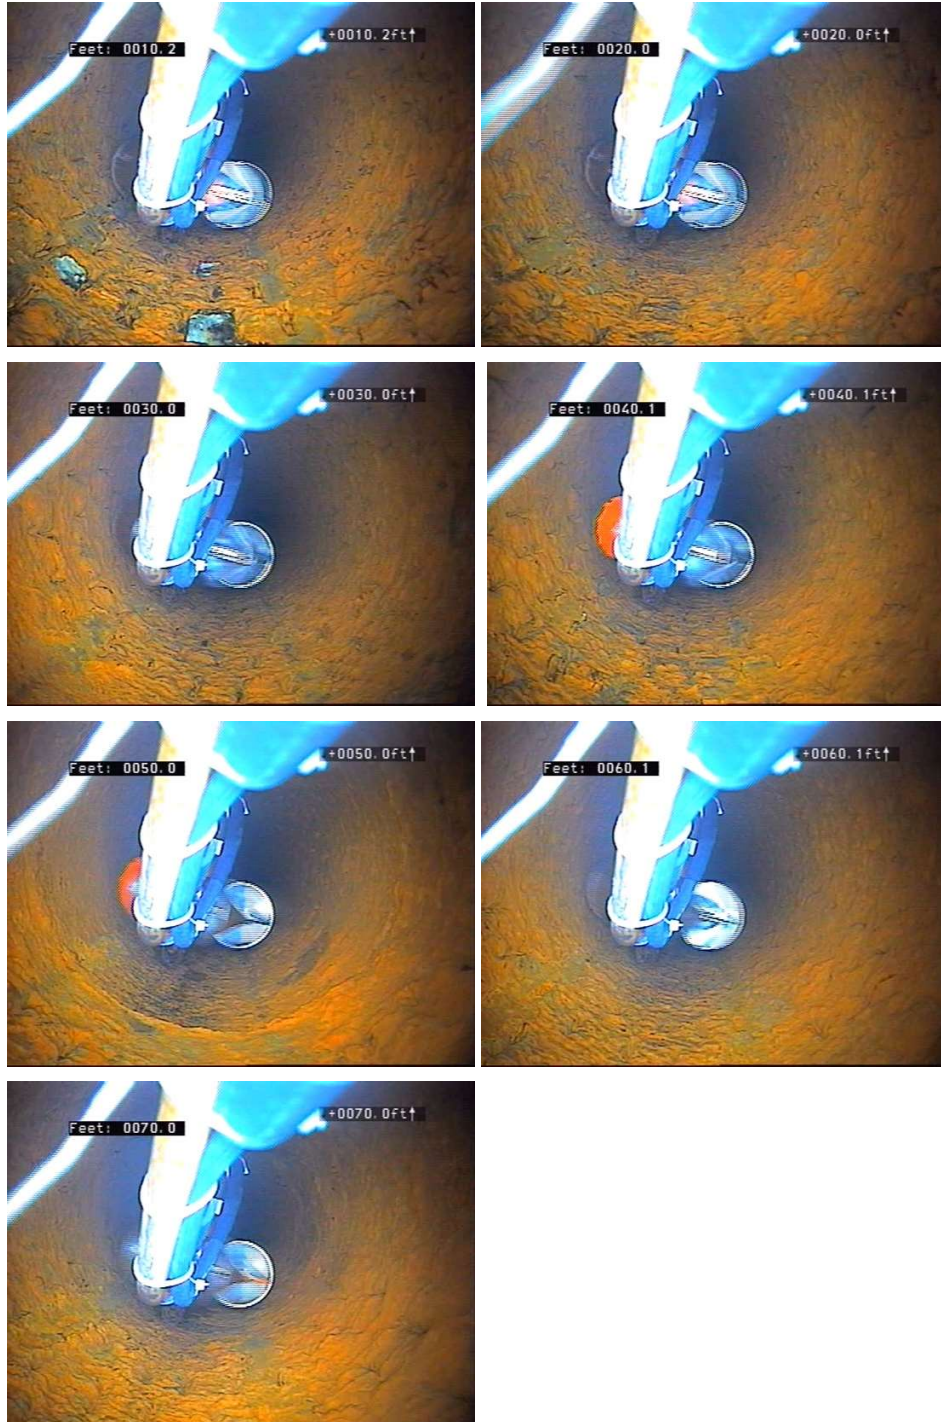

**Figure S2:** Collector Well 3, Lateral 4: 10 ft (3.048 m) progression from the lateral video inspection, 2015 (Source: Sonoma County Water Agency).

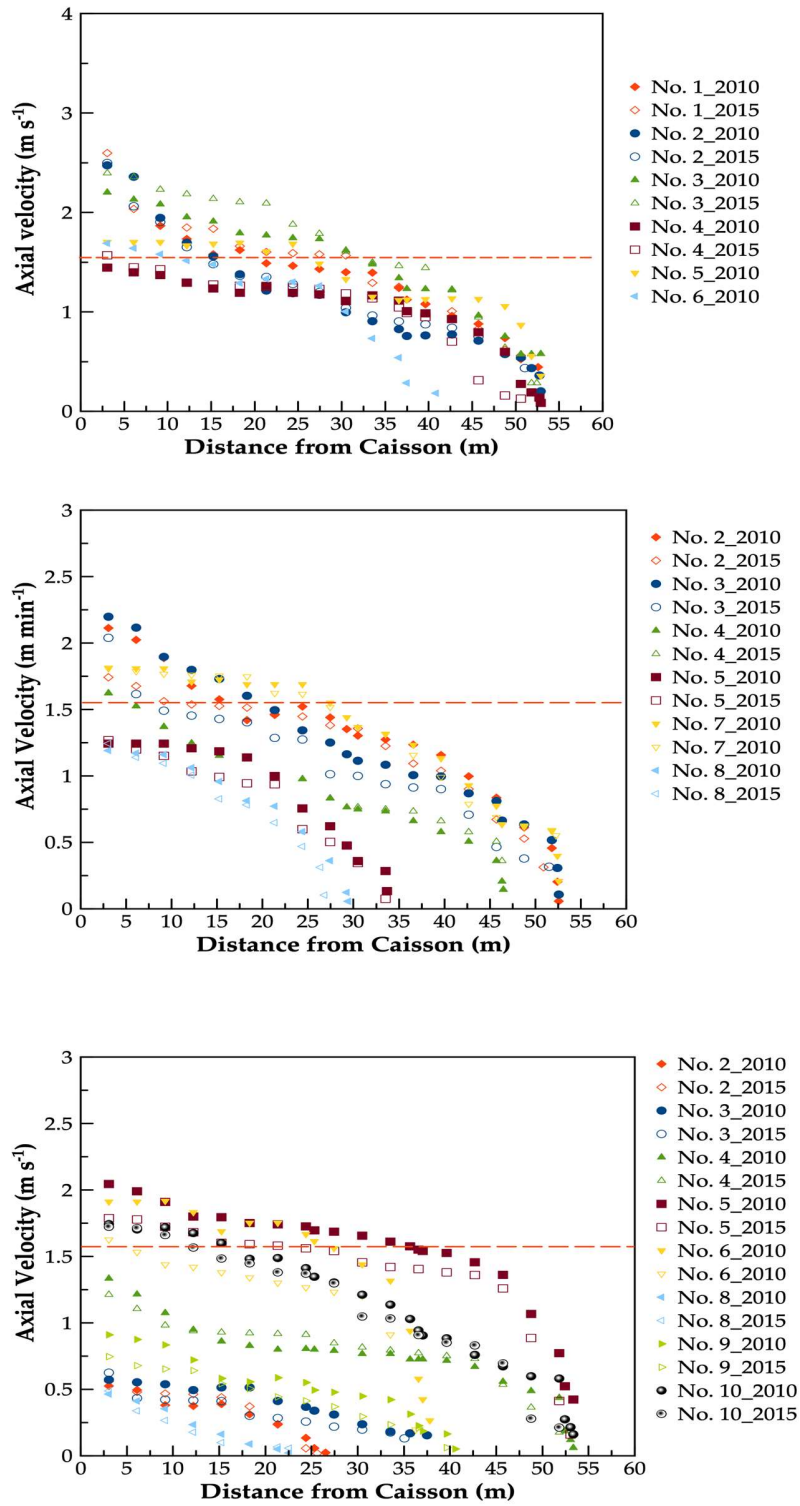

**Figure S3.** Axial velocity in different laterals at increasing distances between the screen length and the caisson for Collector 3 (top), Collector 4 (middle), and Collector 5 (bottom). Optimal design < 1.524 m s<sup>-1</sup> (red line).

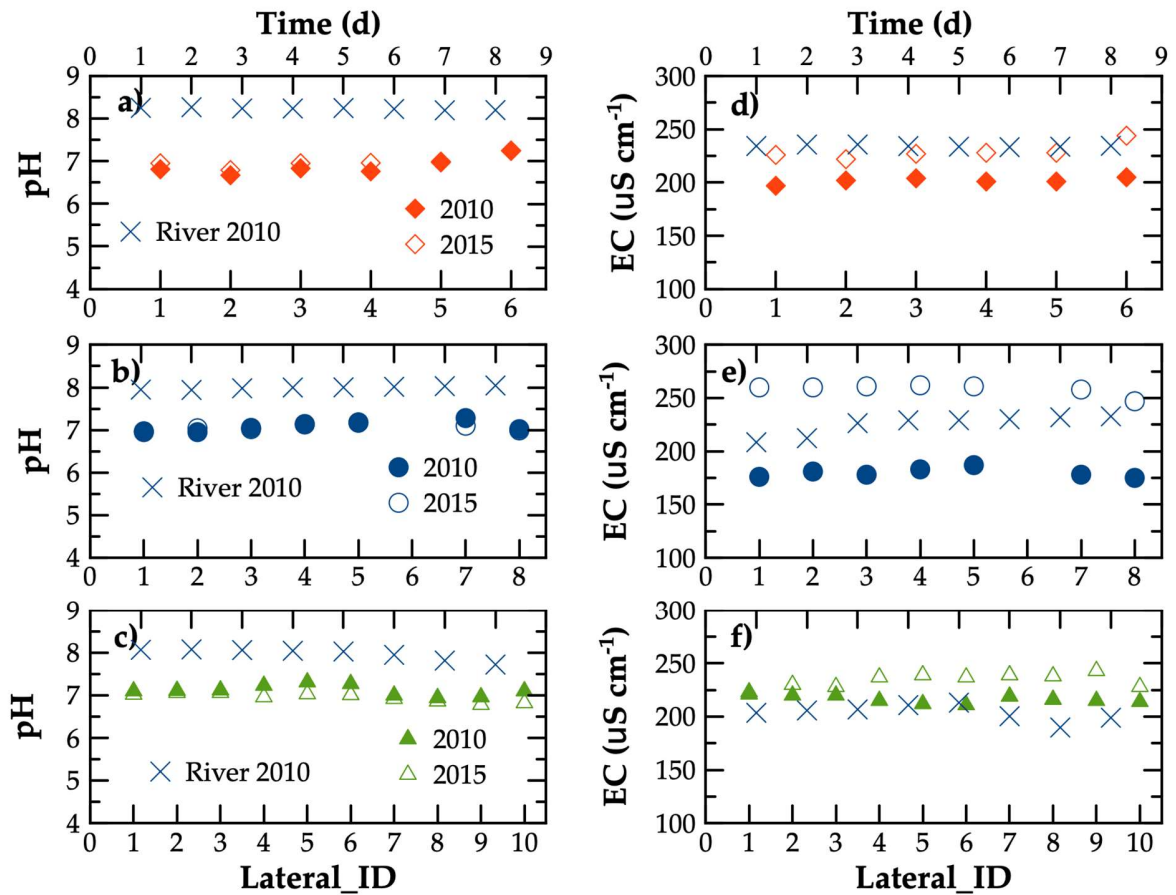

**Figure S4.** pH at a) Collector 3, b) Collector 4, and c) Collector 5; electrical conductivity (EC) at d) Collector 3, e) Collector 4, and f) Collector 5 (Source: [1, 3]). Daily average pH and EC values associated to the Russian River were collected between 4 October (day 0) and 11 October (day 8) 2010, between 8 November (day 0) and 15 November (day 8), and between 18 October (day 0) and 25 October (day 8) 2010 during the capacity testing for Collector 3 (S4a and S4d), Collector 4 (S4b and S4e), and Collector 5 (S4c and S4f), respectively.

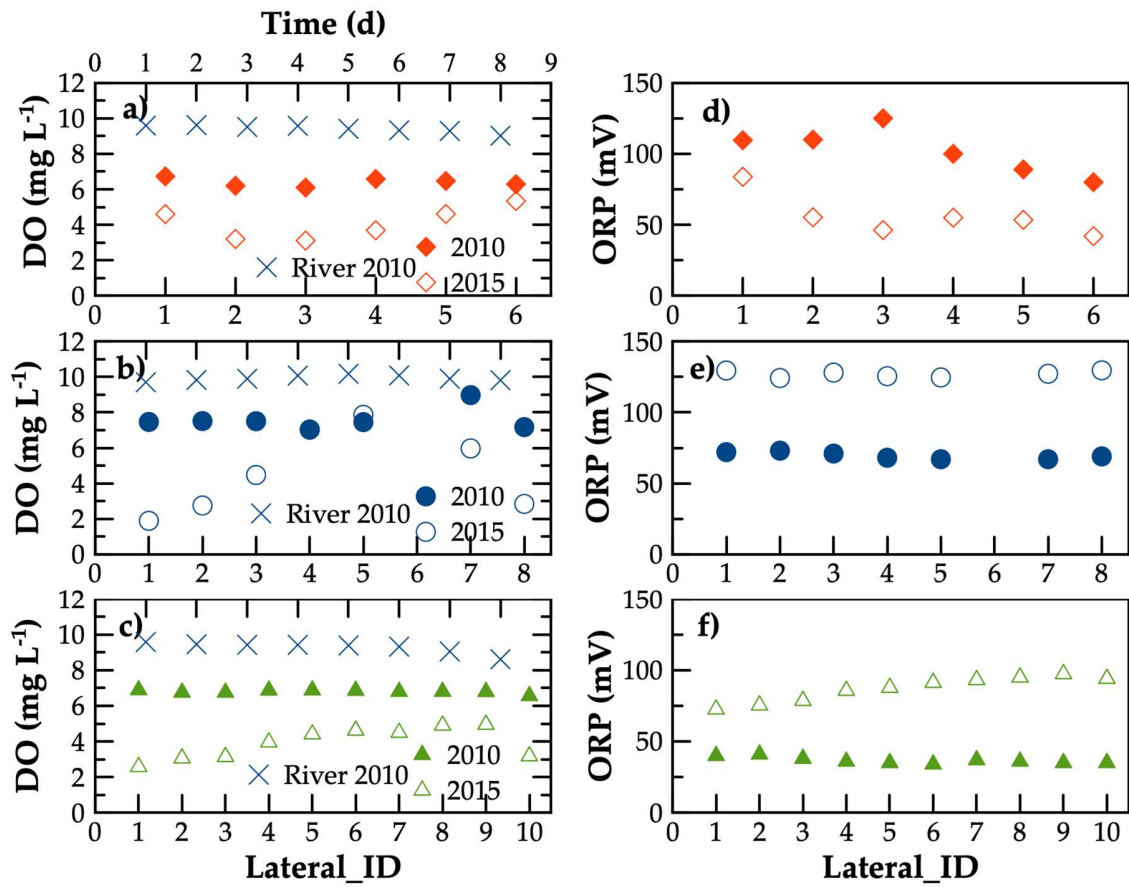

**Figure S5.** Dissolved oxygen (DO) at a) Collector 3, b) Collector 4, and c) Collector 5; redox potential (ORP) at d) Collector 3, e) Collector 4, and f) Collector 5 (Source: [1, 3]). Daily average DO values associated to the Russian River were collected between 4 October (day 0) and 11 October (day 8) 2010, between 8 November (day 0) and 15 November (day 8), and between 18 October (day 0) and 25 October (day 8) 2010 during the capacity testing for Collector 3 (S5a), Collector 4 (S5b), and Collector 5 (S5c), respectively.

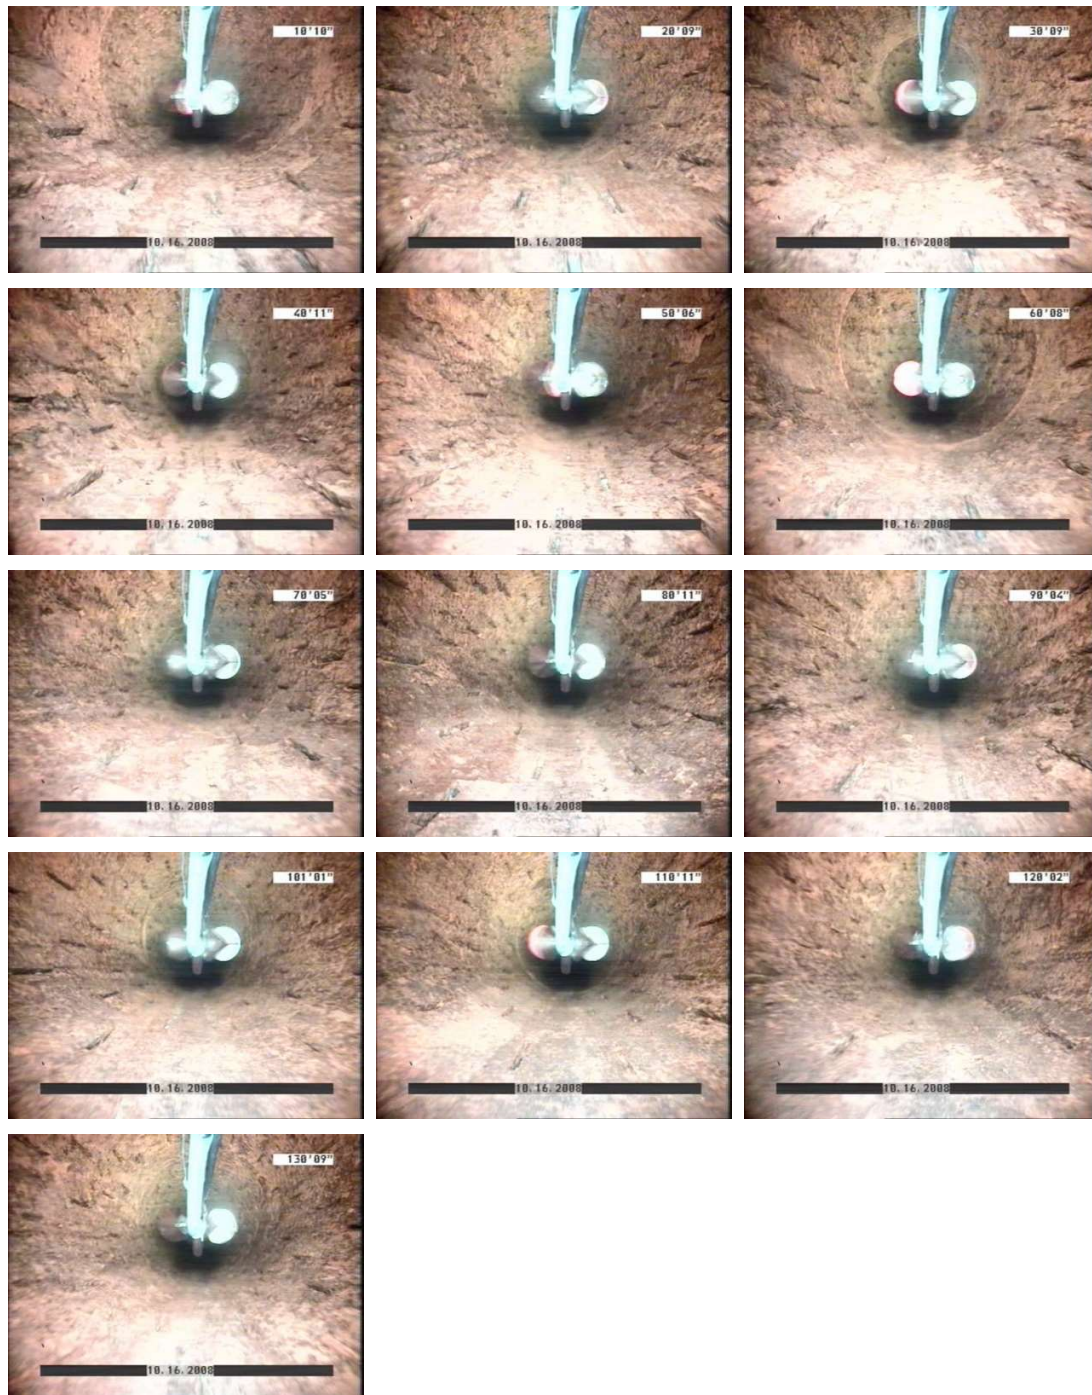

**Figure S6:** Collector Well 6, Lateral 4: 10 ft (3.048 m) progression from the lateral video inspection, 2008 (Source: Sonoma County Water Agency).

**Table S1.** Summary of collector wells and construction parameters<sup>1</sup>.

| <b>Collector Well</b>            | <b>3</b>            | <b>4</b>          | <b>5</b>          |
|----------------------------------|---------------------|-------------------|-------------------|
| Year constructed                 | 1975                | 1975              | 1992              |
| Location                         | South Westside Road | 251 m east of # 3 | 332 m east of # 4 |
| Pump floor elevation (m, AMSL)   | 23.79               | 23.76             | 23.75             |
| Bottom floor elevation (m, AMSL) | -10.07              | -10.90            | -6.49             |
| Total caisson length (m)         | 33.86               | 34.66             | 30.24             |
| Inside diameter of caisson (m)   | 3.96                | 3.96              | 3.96              |
| Number of laterals               | 6                   | 8                 | 10                |

<sup>1</sup> Source: ([1, 2]).

**Table S2.** Summary of laterals' construction parameters<sup>1</sup>.

| <b>Lateral Number</b> | <b>Diameter (m)</b> | <b>Length (m)</b> | <b>Material</b> | <b>Elevation (msl)</b> |
|-----------------------|---------------------|-------------------|-----------------|------------------------|
| Collector Well 3      |                     |                   |                 |                        |
| 1                     | 0.254               | 52.58             | Mild Steel      | -29.55                 |
| 2                     | 0.254               | 52.88             | Mild Steel      | -29.55                 |
| 3                     | 0.254               | 52.88             | Mild Steel      | -29.55                 |
| 4                     | 0.254               | 52.88             | Mild Steel      | -29.55                 |
| 5                     | 0.254               | 52.88             | Mild Steel      | -29.55                 |
| 6                     | 0.254               | 40.84             | Mild Steel      | -29.55                 |
| Collector Well 4      |                     |                   |                 |                        |
| 1                     | 0.254               | 37.95             | Mild Steel      | -33.05                 |
| 2                     | 0.254               | 52.58             | Mild Steel      | -33.05                 |
| 3                     | 0.254               | 52.58             | Mild Steel      | -33.05                 |
| 4                     | 0.254               | 46.48             | Mild Steel      | -33.05                 |
| 5                     | 0.254               | 33.68             | Mild Steel      | -33.05                 |
| 6*                    | 0.254               |                   |                 |                        |
| 7                     | 0.254               | 52.58             | Mild Steel      | -33.05                 |
| 8                     | 0.254               | 29.41             | Mild Steel      | -33.05                 |
| Collector Well 5      |                     |                   |                 |                        |
| 1                     | 0.254               | 51.21             | Mild Steel      | -17.79                 |
| 2                     | 0.254               | 26.52             | Mild Steel      | -17.79                 |
| 3                     | 0.254               | 37.49             | Mild Steel      | -17.79                 |
| 4                     | 0.254               | 53.34             | Mild Steel      | -17.79                 |
| 5                     | 0.254               | 53.34             | Mild Steel      | -17.79                 |
| 6                     | 0.254               | 37.80             | Mild Steel      | -17.79                 |
| 7                     | 0.254               | 21.34             | Mild Steel      | -17.79                 |
| 8                     | 0.254               | 22.56             | Mild Steel      | -17.79                 |
| 9                     | 0.254               | 40.54             | Mild Steel      | -17.79                 |
| 10                    | 0.254               | 53.34             | Mild Steel      | -17.79                 |

\*\* Blank port. <sup>1</sup> Source: ([1, 2]).
